# Supplementary material
Source: Royal Society of Chemistry journal article supplement (doi:10.1039/d6nr01899h)
Supplement: d6nr01899h1.pdf [file d6nr01899h1.pdf]

## Supporting Information

### Submicron Interfacial Layers for Nanoscale Control of Lithium Deposition in Surface-Engineered Current Collectors

*Yujin Lee<sup>a,†</sup>, Wootae Choi<sup>a,†</sup>, Sujeong Woo<sup>b</sup>, Yeonsoo Cho<sup>a</sup>, Geunah Lim<sup>b</sup>, Jin Joo<sup>b</sup>, Kyung Rok Han<sup>b</sup>, In Woo Cheong<sup>b</sup>, Dongsoo Lee<sup>c,\*</sup>, Junghyun Choi<sup>c,\*</sup>, and Patrick Joohyun Kim<sup>a,b,\*</sup>*

<sup>a</sup>School of Semiconductor Convergence Engineering, Kyungpook National University, Daegu, 41566, Korea; [pjkim@knu.ac.kr](mailto:pjkim@knu.ac.kr)

<sup>b</sup> School of Chemical Engineering and Applied Chemistry, Kyungpook National University, Daegu, 41566, Korea

<sup>c</sup> School of Chemical, Biological and Battery Engineering, Gachon University, Seongnam-si, Gyeonggi-do 13120, Republic of Korea. E-mail: [dslee9117@gachon.ac.kr](mailto:dslee9117@gachon.ac.kr); [junghchoi@gachon.ac.kr](mailto:junghchoi@gachon.ac.kr).

<sup>†</sup>These authors contributed equally to this work.

\*Corresponding Author

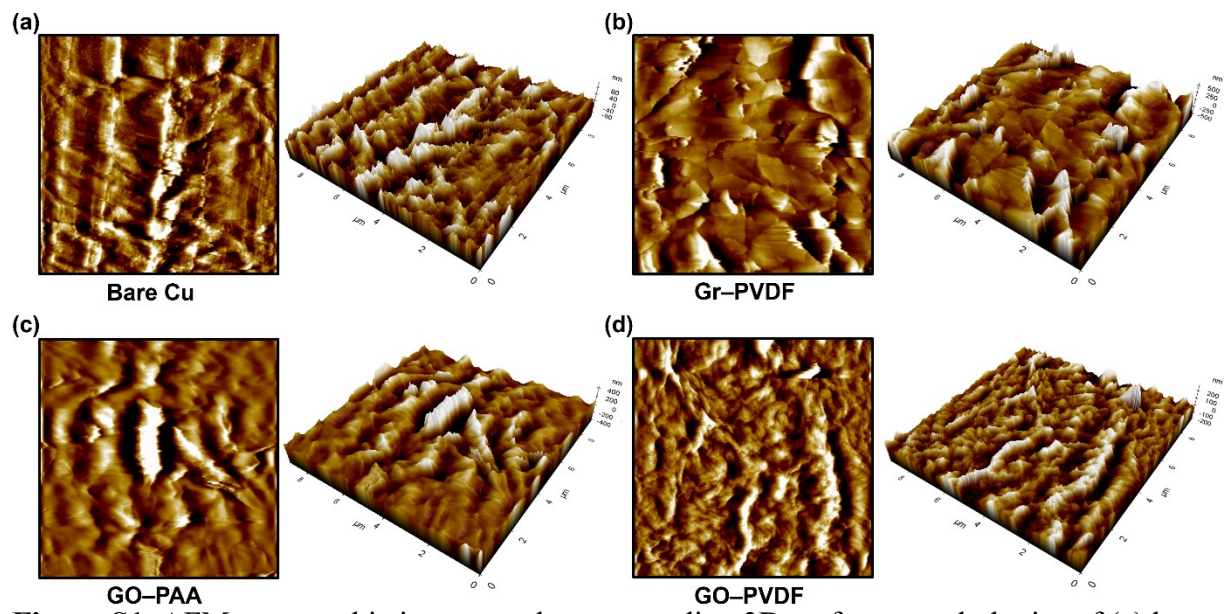

**Figure S1.** AFM topographic images and corresponding 3D surface morphologies of (a) bare Cu, (b) Gr-PVDF, (c) GO-PAA, and (d) GO-PVDF.

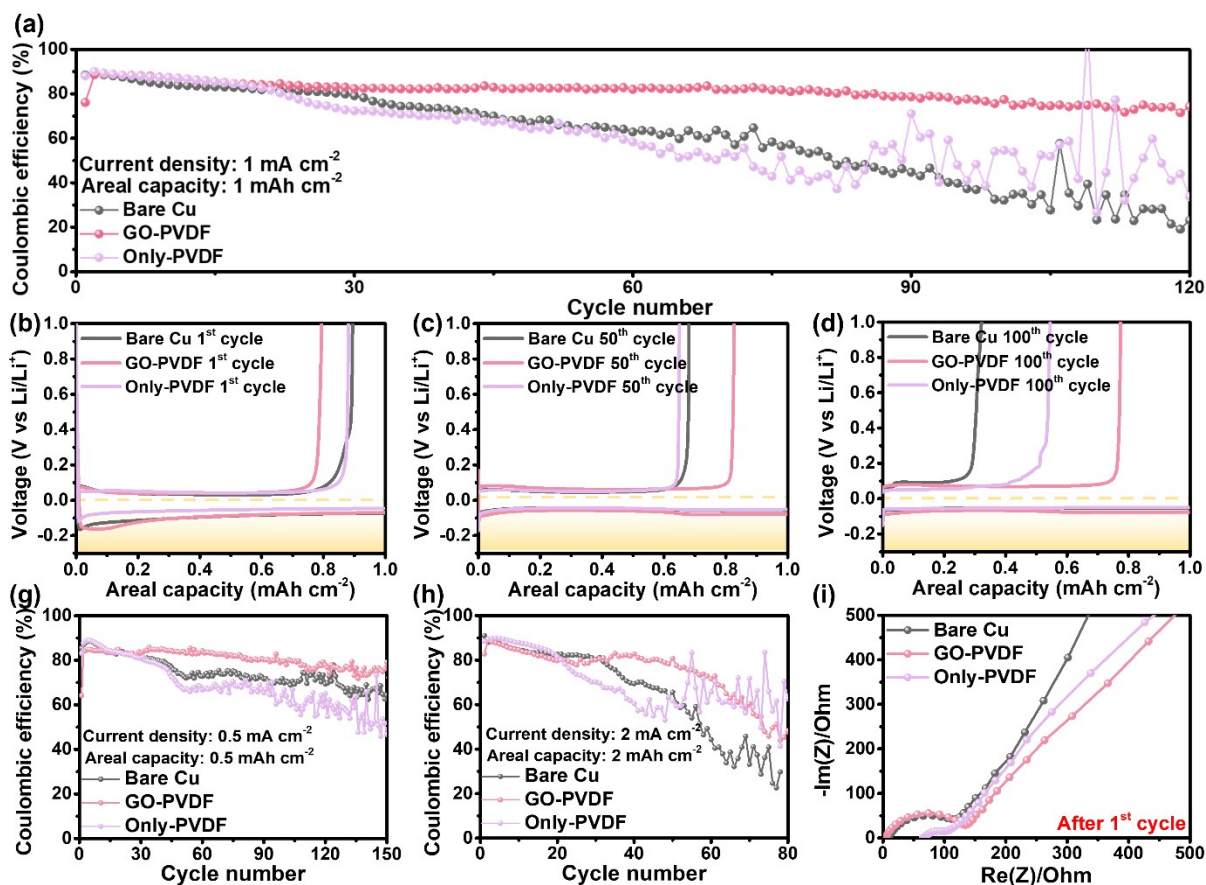

**Figure S2.** (a) Cycling performance of Li||Cu half cells employing bare Cu, GO–PVDF, and Only-PVDF at a current density of  $1.0 \text{ mA cm}^{-2}$  and an areal capacity of  $1.0 \text{ mAh cm}^{-2}$ . Galvanostatic charge–discharge profiles at the (b) 1st, (c) 50th, and (d) 100th cycles. Cycling performance at (g)  $0.5 \text{ mA cm}^{-2}$  with an areal capacity of  $0.5 \text{ mAh cm}^{-2}$  and (h)  $2.0 \text{ mA cm}^{-2}$  with an areal capacity of  $2.0 \text{ mAh cm}^{-2}$ . (i) Electrochemical impedance spectroscopy (EIS) spectra acquired after the 1st cycle.

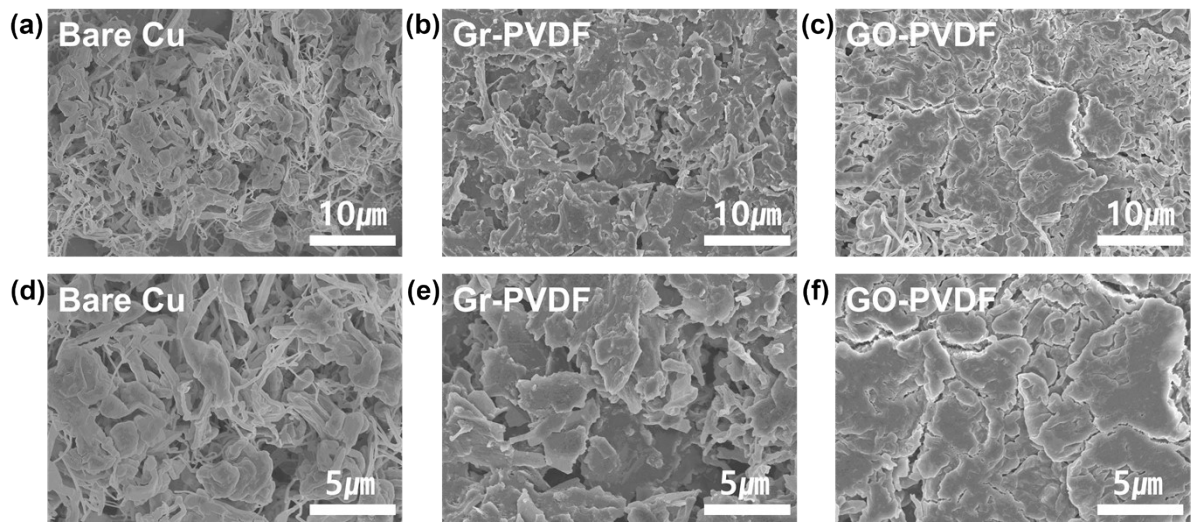

**Figure S3.** (a–c) Low-magnification SEM images and (d–f) high-magnification SEM images of the initially deposited Li on bare Cu, Gr–PVDF and GO–PVDF current collectors after Li plating at  $0.5 \text{ mA cm}^{-2}$  and  $0.5 \text{ mAh cm}^{-2}$ .

|         | Li deposit width ( $\mu\text{m}$ ) | $R_{\text{ct}}$ after 1 cycle( $\Omega$ ) | $R_{\text{ct}}$ after 100 cycles ( $\Omega$ ) |
|---------|------------------------------------|-------------------------------------------|-----------------------------------------------|
| Bare Cu | 0.61                               | 113                                       | 381                                           |
| Gr-PVDF | 1.37                               | 36                                        | 175                                           |
| GO-PAA  | 1.28                               | 102                                       | 171                                           |
| GO-PVDF | 2.27                               | 134                                       | 142                                           |

**Table S1.** Correlation between Li growth morphology and charge-transfer resistance evolution during cycling.
